# Supplementary material for: Development of enduring interstitial defects in Mg-doped CuO thin films
Source: Royal Society of Chemistry journal article supplement (doi:10.1039/d4ra01414f), 2024-01-01
Supplement: d4ra01414f1.pdf [file d4ra01414f1.pdf]

## Development of Enduring Interstitial Defects in Mg Doped CuO Thin Films

Adithya Prakash, Vikash Mishra, M G Mahesha\*

Department of Physics, Manipal Institute of Technology, Manipal Academy of Higher Education  
576104, India

\*Corresponding Author.

Email: [mahesha.mg@manipal.edu](mailto:mahesha.mg@manipal.edu)

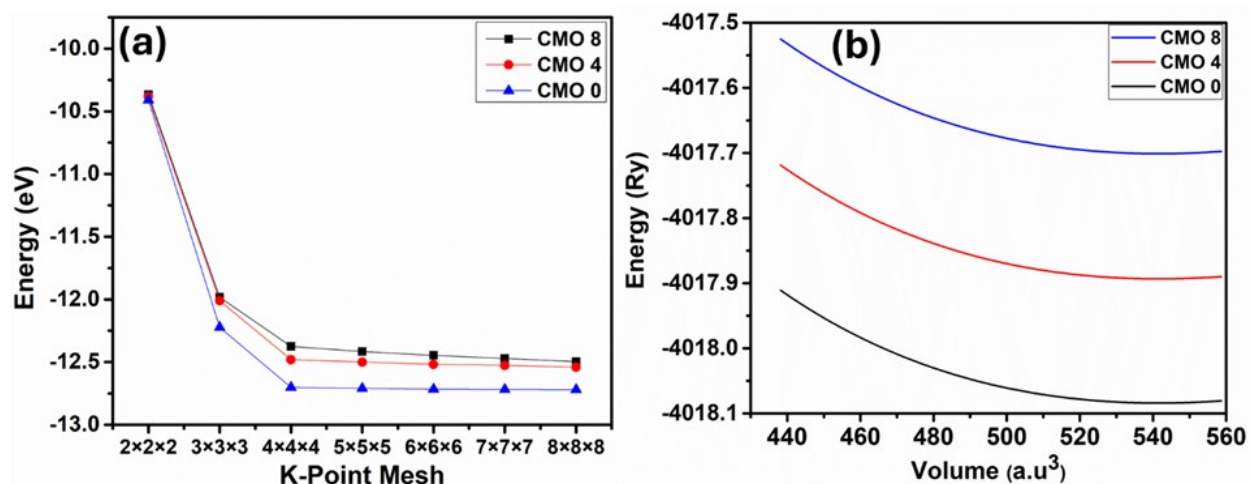

Fig S1: (a) K-point and (b) volume optimization.

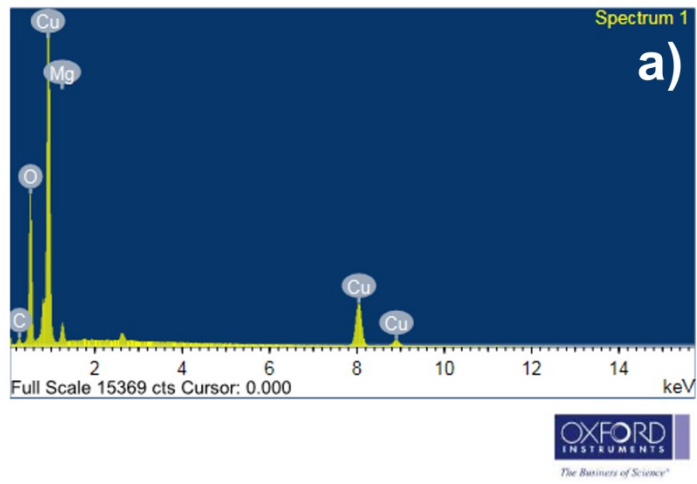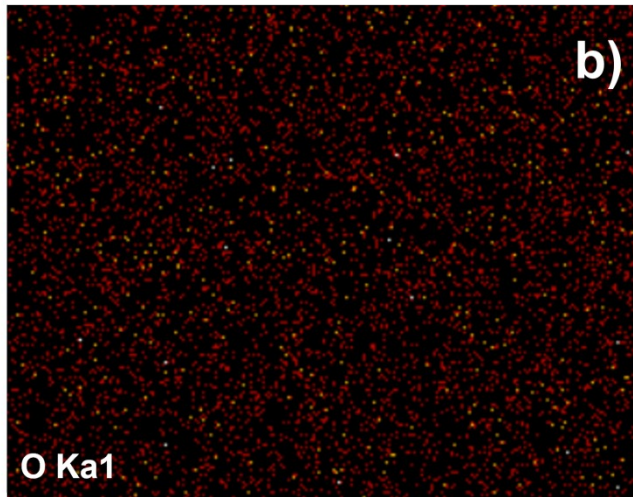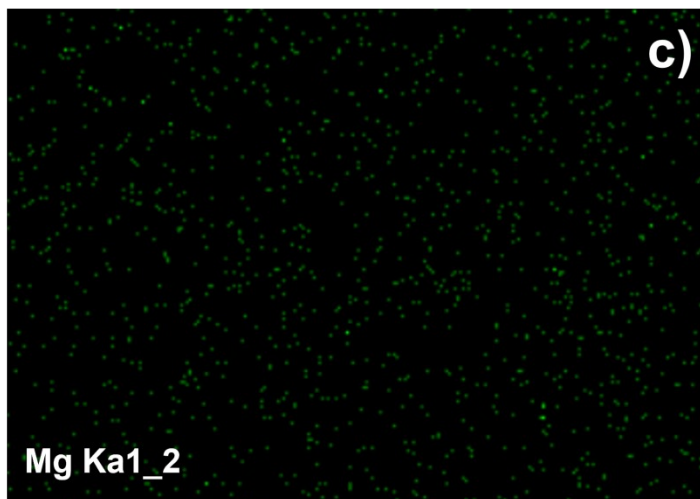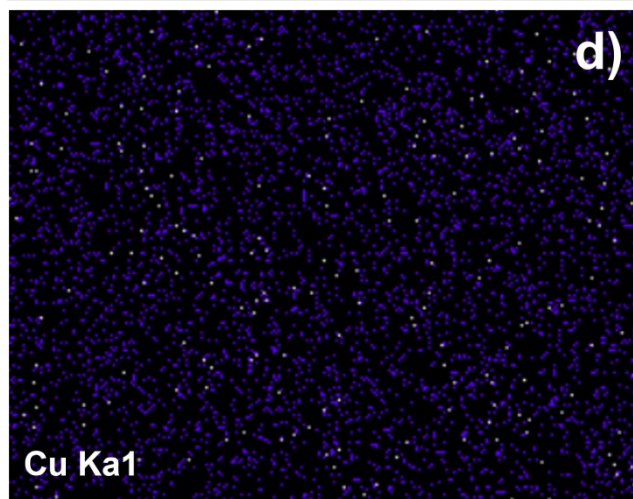

*Fig S2: Representative a) EDAX spectrum, elemental mapping of b) O, c) Mg, d) Cu of CMO 8 sample*

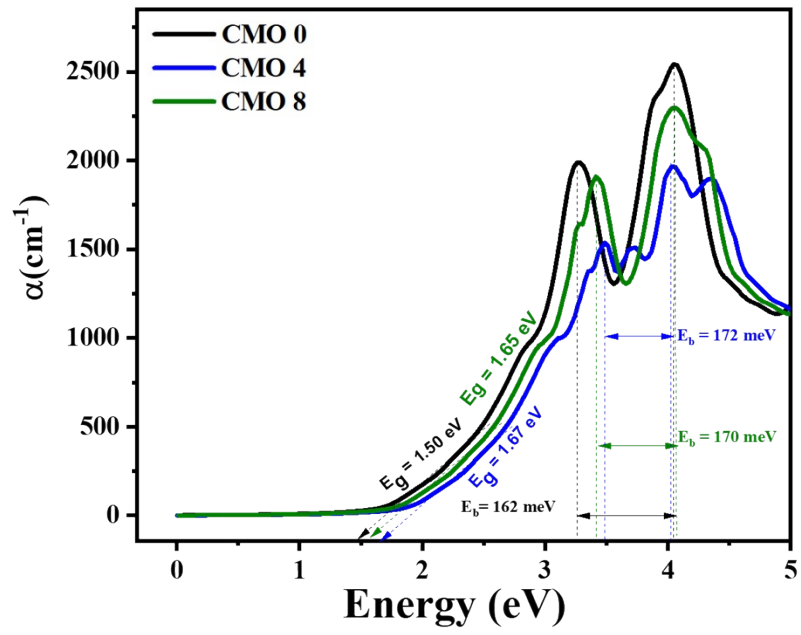

*Fig S3: Simulated optical spectra of (a) CMO 0 (b) CMO 4 and (c) CMO 8*

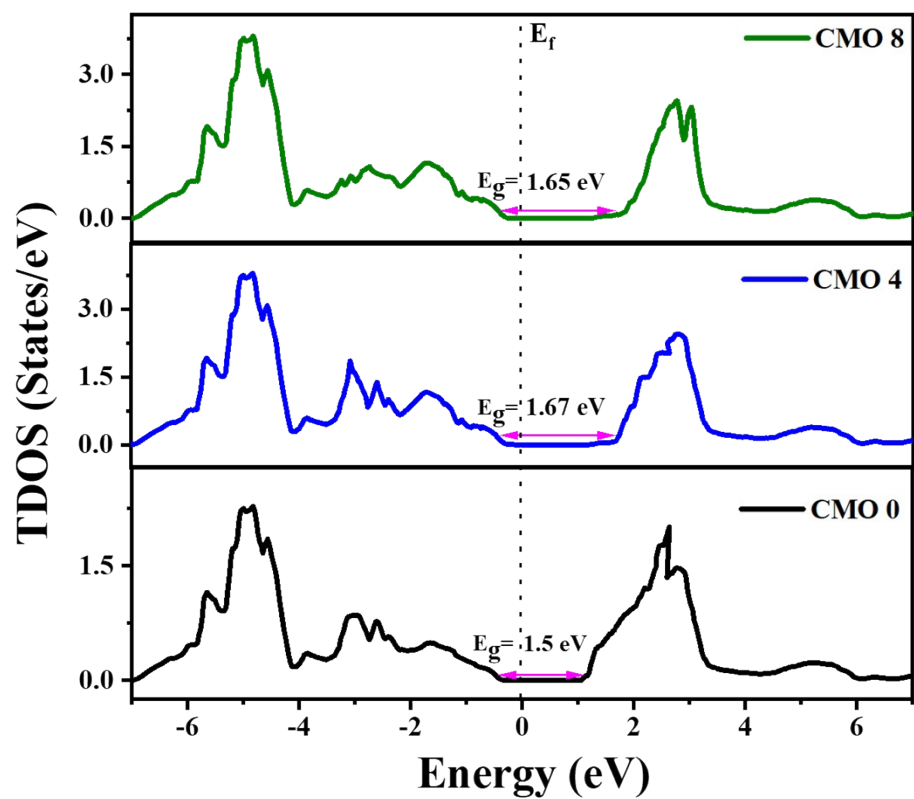

*Fig S4: Total density of states of (a) CMO 0 (b) CMO 4 and (c) CMO 8*
